# Supplementary material for: A critical-like collective state leads to long-range cell communication in Dictyostelium discoideum aggregation
Source: PubMed Central journal article supplement (PMC5396852; doi:10.1371/journal.pbio.1002602), 2017-04-19

**A**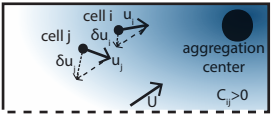**B**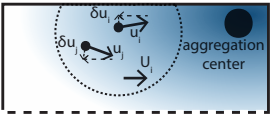

Supplement: pbio.1002602.s007.pdf [file pbio.1002602.s007.pdf]
